# Supplementary material for: Rab11-family interacting proteins define spatially and temporally distinct regions within the dynamic Rab11a-dependent recycling system
Source: PubMed Central journal article supplement — Mol Biol Cell. 2013 Mar 1;24(5):643–58. doi: 10.1091/mbc.E12-09-0659 (PMC3583667; doi:10.1091/mbc.e12-09-0659), 2013-03-01

**Supplemental Figure Legends:**

**Supplemental Figure 1: GFP-FIP1B and mCherry-FIP1C overlap in the pericentriolar recycling compartment.** Time lapse images were collected for two minutes (Video 7). Perinuclear localization was observed in dual expression studies of FIP1B and FIP1C in two independent experiments. Bar, 10 $\mu$ m.

**Supplemental Figure 2: Rab11-FIP2 accumulates in the pericentriolar region of live HeLa cells in the presence of FIP1B, FIP1C, or FIP3.** HeLa cells transfected with EGFP-Rab11-FIPs (FIP1B, FIP1C, or FIP3) and mCherry-Rab11-FIP2 were imaged with time-lapse deconvolution microscopy (Video 9). The mCherry-Rab11-FIP2 accumulated in pericentriolar compartments in the presence of FIP1B, FIP1C, and FIP3. Data are representative of 3 independent experiments. Bars, 10  $\mu$ m.

**Supplemental Videos:**

**Video 1. EGFP-Rab11 and EGFP-Rab11-FIP1 protein localization and movement in live HeLa cells.** HeLa cells transfected with EGFP-Rab11-FIPs were analyzed by time-lapse deconvolution microscopy. Frames were taken at least every 2 seconds for 2 minutes and the display rates are set to 2 frames per second. Representative still images are presented in Figure 1. Panels from left to right: EGFP-Rab11a, EGFP-FIP1A, EGFP-FIP1B, and EGFP-FIP1C.

**Video 2. EGFP-FIP1A and Cherry-Rab11a colocalization and movement in live HeLa cells.** HeLa cells transfected with EGFP-FIP1A and Cherry-Rab11a were

analyzed by time-lapse deconvolution microscopy. Frames were taken at least every 2 seconds for 2 minutes and the display rates are set to 2 frames per second.

Representative still images are presented in Figure 2. Panels from left to right: EGFP-FIP1A, Cherry-Rab11a, and Merged.

**Video 3. EGFP-FIP1B and EGFP-FIP1C with Cherry-Rab11a colocalization and movement in live HeLa cells.**

HeLa cells transfected with EGFP-FIP1B or EGFP-FIP1C and Cherry-Rab11a were analyzed by time-lapse deconvolution microscopy. Frames were taken at least every 2 seconds for 2 minutes and the display rates are set to 2 frames per second. Representative still images are presented in Figure 2. Top Panels from left to right: EGFP-FIP1B, Cherry-Rab11a, and Merged. Bottom Panels from left to right: EGFP-FIP1C, Cherry-Rab11a, and Merged.

**Video 4. EGFP-FIP1A or EGFP-FIP1C and transferrin-Alexa-568 in HeLa cells.**

HeLa cells transfected with EGFP-FIP1A or EGFP-FIP1C, incubated with transferrin-Alexa-568 for 5 minutes, and chased for 1 hour were analyzed by time-lapse deconvolution microscopy. Frames were taken every 5 minutes for 1 hour and the display rates are set to 2 frames per second. Representative still images are presented in Figure 4. Top panels left to top right: EGFP-FIP1A, transferrin-568, and Merged. Bottom panels left to bottom right: EGFP-FIP1C, transferrin-568, and Merged.

**Video 5. EGFP-Rab11-FIP1B and Cherry-FIP1A tubular compartments in live HeLa cells.**

HeLa cells transfected with EGFP-FIP1B and Cherry-FIP1A were analyzed by

time-lapse deconvolution microscopy. Frames were taken at least every 2 seconds for 2 minutes and the display rates are set to 2 frames per second. Representative still images are presented in Figure 6. Panels from left to right: EGFP-FIP1B, Cherry-FIP1A, and Merged.

**Video 6. EGFP-FIP1C and Cherry-FIP1A tubular compartments in live HeLa cells.**

HeLa cells transfected with EGFP-FIP1C and Cherry-FIP1A were analyzed by time-lapse deconvolution microscopy. Frames were taken at least every 2 seconds for 2 minutes and the display rates are set to 2 frames per second. Representative still images are presented in Figure 6. Panels from left to right: EGFP-FIP1C, Cherry-FIP1A, and Merged.

**Video 7. EGFP-FIP1B and mCherry-FIP1C overlap on static centralized**

**compartments.** HeLa cells transfected with EGFP-FIP1B and mCherry-FIP1C were analyzed by time lapse deconvolution microscopy for 2 minutes. Frames were collected every 2 seconds and the display rate is set to 2 frames per second. Representative still images are presented in supplemental Figure 1. Panels from left to right: EGFP-FIP1B, mCherry-FIP1C, and Merged.

**Video 8. Transferrin passage through endosomal tubules labeled by both**

**Cerulean-FIP1C and Venus-FIP1A.** HeLa cells transfected with Cerulean-FIP1C and Venus-FIP1A were treated with transferrin-568 and analyzed by time lapse deconvolution microscopy for 1 hr. Frames were collected every 5 minutes and the

display rate is set to 2 frames per second. Representative still images are presented in Figure 7. Panels from left to right: Cerulean-FIP1C, Venus-FIP1A, transferrin-568, and Merged.

**Video 9. mCherry-FIP2 accumulates in the perinuclear region of HeLa cells in the presence of EGFP-FIP1B, FIP1C, and FIP3.** HeLa cells transfected with EGFP-FIP1B, FIP1C, or FIP3 and mCherry-FIP2 were analyzed by time lapse deconvolution microscopy for 2 minutes. Frames were collected every 2 seconds and the display rate is set to 2 frames per second. Representative still images are presented in supplemental Figure 2. Top Panels from left to right: EGFP-FIP1B, mCherry-FIP2, and Merged. Middle Panels from left to right: EGFP-FIP1C, mCherry-FIP2, and Merged. Bottom Panels from left to right: EGFP-FIP3, mCherry-FIP2, and Merged.

**Video 10. EGFP-FIP2 or EGFP-FIP5 and Cherry-FIP1A separation in live HeLa cells.** HeLa cells transfected with EGFP-FIP2 or EGFP-FIP5 and Cherry-Rab11a were analyzed by time-lapse deconvolution microscopy. Frames were taken at least every 2 seconds for 2 minutes and the display rates are set to 2 frames per second. Representative still images are presented in Figure 8. Top panels from left to right: EGFP-FIP2, Cherry-FIP1A, and Merged. Bottom panels from left to right: EGFP-FIP5, Cherry-FIP1A, and Merged.

**Video 11. EGFP-FIP5 and Cherry-FIP2 overlap in live HeLa cells.** HeLa cells transfected with EGFP-FIP5 and Cherry-FIP2 were analyzed by time-lapse

deconvolution microscopy. Frames were taken at least every 2 seconds for 2 minutes and the display rates are set to 2 frames per second. Representative still images are presented in Figure 8. Panels from left to right: EGFP-FIP5, Cherry-FIP2, and Merged.

**Video 12. EGFP-FIP3 and Cherry-FIP1A on tubular compartments in live HeLa cells.** HeLa cells transfected with EGFP-FIP3 and Cherry-FIP1A were analyzed by time-lapse deconvolution microscopy. Frames were taken at least every 2 seconds for 2 minutes and the display rates are set to 2 frames per second. Representative still images are presented in Figure 11A. Panels from left to right: EGFP-FIP3, Cherry-FIP1A, and Merged.

**Video 13. EGFP-FIP3 and Cherry-FIP1C overlap on tubular compartments in live HeLa cells.** HeLa cells transfected with EGFP-FIP3 and Cherry-FIP1C were analyzed by time-lapse deconvolution microscopy. Frames were taken at least every 2 seconds for 2 minutes and the display rates are set to 2 frames per second. Representative still images are presented in Figure 11B. Panels from left to right: EGFP-FIP3, Cherry-FIP1A, and Merged.

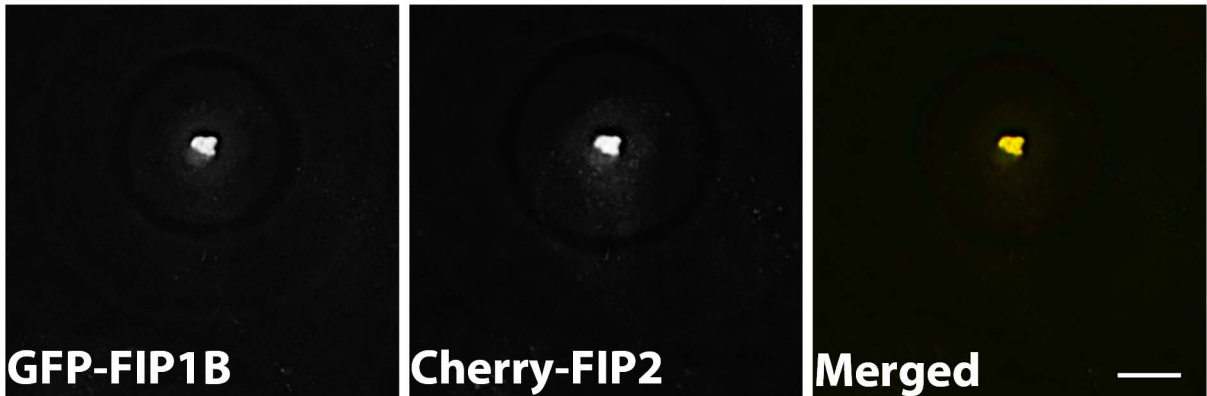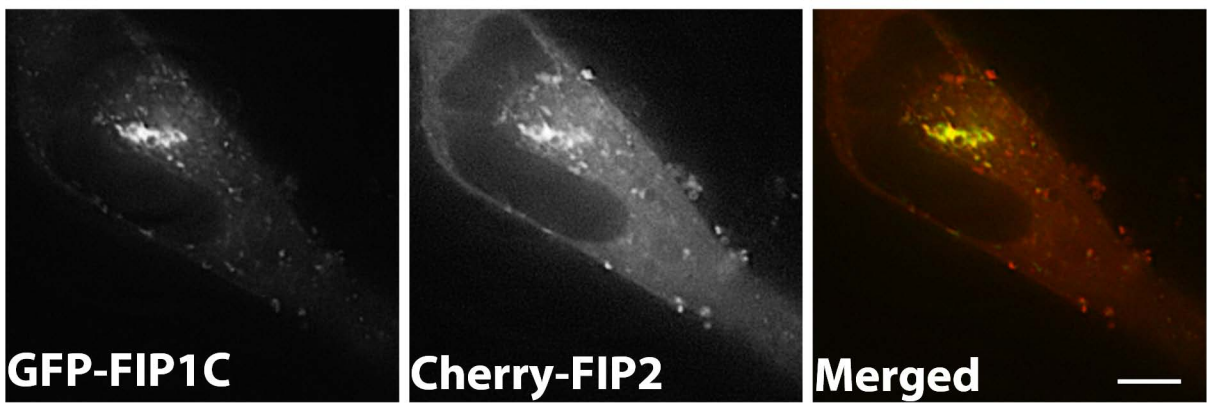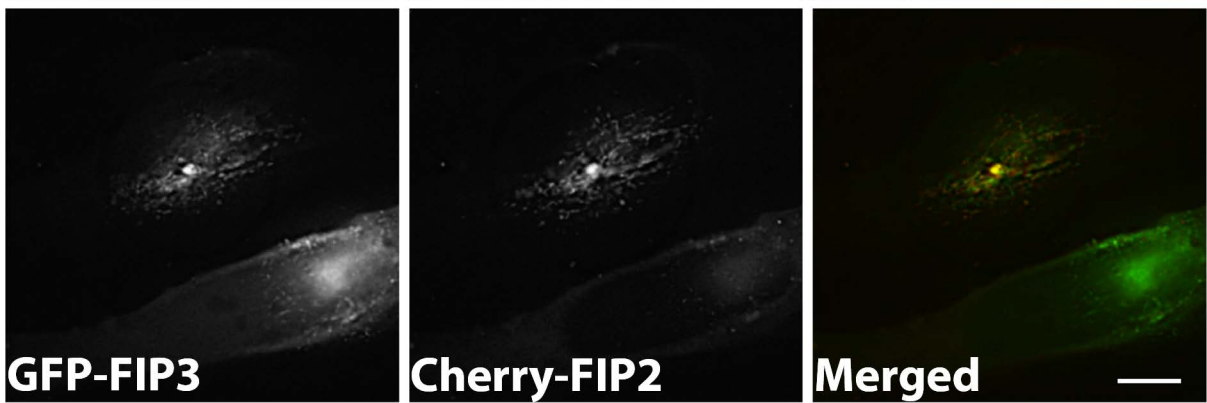

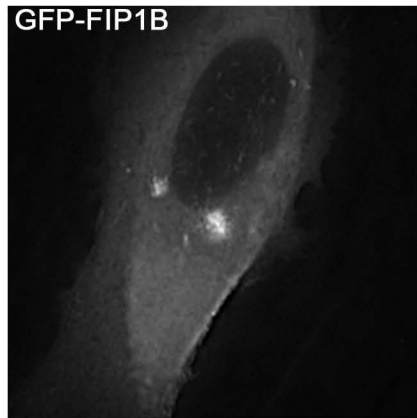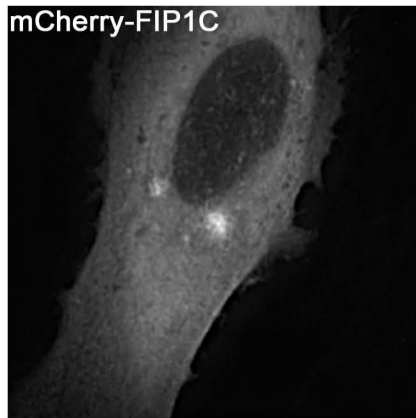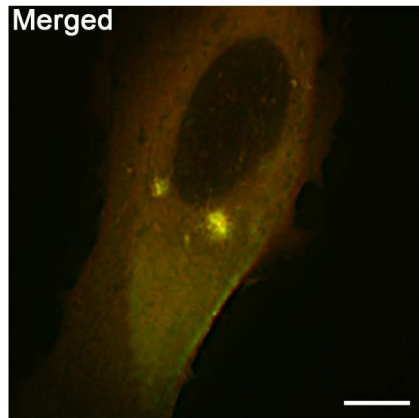

Supplement: supp_E12-09-0659v1_CombinedSupMats.pdf [file supp_E12-09-0659v1_CombinedSupMats.pdf]
